# Supplementary material
Source: PubMed Central journal article supplement (PMC2952196)
Supplement: supp_M110.148718_Szerlong_Fig_S4.pdf [file supp_M110.148718_Szerlong_Fig_S4.pdf]

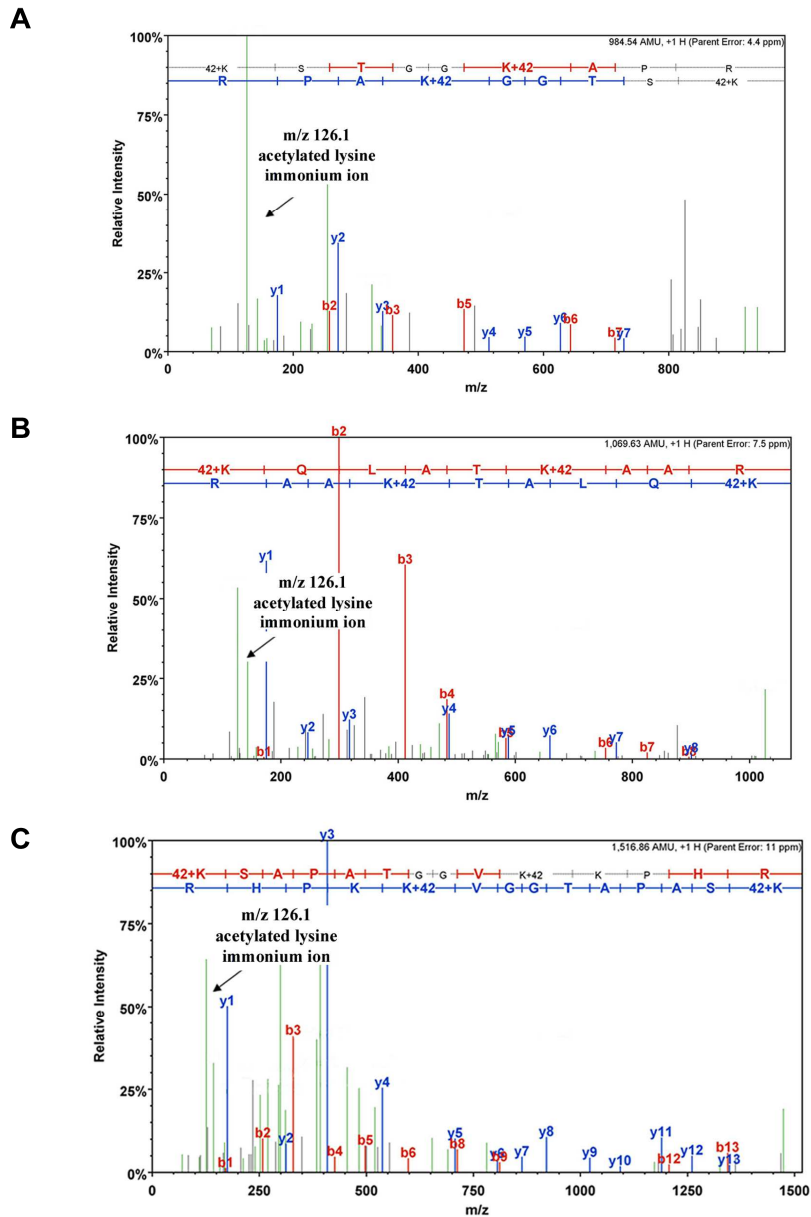

**Fig. S4.** MS/MS spectrum of histone H3 acetylated peptides. **A.** MS/MS spectrum of peptide  ${}^9\text{K}_{\text{AC}}\text{STGGK}_{\text{AC}}\text{APR}^{17}$  (amino acids 9-17 of *X. laevis* H3 sequence) confirming acetylation on lysines 9 and 14. Confirmation is based on the Mascot ion score of 50 and coverage of theoretical y (blue) and b (red) ions including the sequence region of acetylated K9. **B.** MS/MS spectrum of peptide  ${}^{18}\text{K}_{\text{AC}}\text{QLATK}_{\text{AC}}\text{AAR}^{26}$  (amino acids 18-26 of *X. laevis* H3 sequence) confirming acetylation on lysines 18 and 23. Confirmation is based on the Mascot ion score of 56 and coverage of theoretical y (blue) and b (red) ions including the sequence region of acetylated K18 and K23. **C.** MS/MS spectrum of peptide  ${}^{27}\text{K}_{\text{AC}}\text{SAPATGGVK}_{\text{AC}}\text{KPHR}^{40}$  (amino acids 27-40 of *X. laevis* H3 sequence) confirming acetylation on lysines 27 and 36. Confirmation is based on the Mascot ion score of 118 and coverage of theoretical y (blue) and b (red) ions including the sequence region of acetylated K27 and K36 (in addition to the absence of y and b ion coverage that would indicate acetylation at K37). For A, B and C, the peak at m/z 126 corresponds to an acetylated lysine immonium ion – NH<sub>3</sub> and peaks corresponding to internal fragmentation are shown in green.
