# Supplementary material
Source: PubMed Central journal article supplement (PMC2952196)
Supplement: supp_M110.148718_Szerlong_Table_S1.pdf [file supp_M110.148718_Szerlong_Table_S1.pdf]

**Table S1. Summary of p300 acetylated histones with and without activators by MALDI-TOF**

| Histone               | Lysine                      | + Tax/pCREB<br>Measured (MH+) | - Tax/pCREB<br>Measured (MH+) | Calculated<br>mass                                             | Peptide Sequence                                                                                       |
|-----------------------|-----------------------------|-------------------------------|-------------------------------|----------------------------------------------------------------|--------------------------------------------------------------------------------------------------------|
| <b>H3</b>             | <b>Fully acetylated</b>     |                               |                               |                                                                |                                                                                                        |
|                       | K9, K14                     | 985.543                       | 985.545                       | 984.5352                                                       | <sup>9</sup> K <sub>AC</sub> STGGK <sub>AC</sub> APR <sup>17</sup>                                     |
|                       | K18, K23                    | 1070.64                       | 1070.631                      | 1069.6243                                                      | <sup>18</sup> K <sub>AC</sub> QLATK <sub>AC</sub> AAR <sup>26</sup>                                    |
|                       | K27, K36, K37               | 1559.856                      | 1559.814                      | 1558.8579                                                      | <sup>27</sup> K <sub>AC</sub> SAPATGGVK <sub>AC</sub> K <sub>AC</sub> PHR <sup>40</sup>                |
|                       | <b>Partially acetylated</b> |                               |                               |                                                                |                                                                                                        |
|                       | (1) acetyl                  | Absent                        | 1028.606                      | 1027.614                                                       | <sup>18</sup> KQLATKAAR <sup>26</sup>                                                                  |
|                       | (1) acetyl                  | Absent                        | 1475.84                       | 1474.837                                                       | <sup>27</sup> KSAPATGGVKKPHR <sup>40</sup>                                                             |
|                       | (2) acetyl                  | 1517.852                      | 1517.821                      | 1516.8474                                                      | <sup>27</sup> KSAPATGGVKKPHR <sup>40</sup>                                                             |
|                       | <b>Unmodified</b>           |                               |                               |                                                                |                                                                                                        |
|                       | K56                         | 1250.718                      | 1250.703                      | 1249.703                                                       | <sup>54</sup> YQKSTELLIR <sup>63</sup>                                                                 |
|                       | K64                         | 788.494                       | 788.484                       | 787.4704                                                       | <sup>64</sup> KLPFQR <sup>69</sup>                                                                     |
|                       | K79                         | 1335.692                      | 1335.676                      | 1334.683                                                       | <sup>73</sup> EIAQDFKTDLR <sup>83</sup>                                                                |
|                       | K122                        | 1384.811                      | 1384.789                      | 1383.7908                                                      | <sup>117</sup> VTIMPKDIQLAR <sup>128</sup>                                                             |
| <b>Not Determined</b> |                             |                               |                               |                                                                |                                                                                                        |
| K4                    | ND                          | ND                            | 704.4                         | <sup>3</sup> TKQ TAR <sup>8</sup>                              |                                                                                                        |
| K115                  | ND                          | ND                            | 3598.8                        | <sup>84</sup> FQSSAVMALQEASEAYLVGLFEDTNLCGIHAKR <sup>116</sup> |                                                                                                        |
| <b>H4</b>             | <b>Fully acetylated</b>     |                               |                               |                                                                |                                                                                                        |
|                       | K5, K8, K12, K16            | 1438.77                       | 1438.866                      | 1437.805                                                       | <sup>4</sup> GK <sub>AC</sub> G GK <sub>AC</sub> GLGK <sub>AC</sub> GGAK <sub>AC</sub> R <sup>17</sup> |
|                       | <b>Partially acetylated</b> |                               |                               |                                                                |                                                                                                        |
|                       | (2) acetyl                  | 1354.701                      | 1354.82                       | 1353.784                                                       | <sup>4</sup> GKGGKGLGKGGAKR <sup>17</sup>                                                              |
|                       | (3) acetyl                  | 1396.743                      | 1396.843                      | 1395.795                                                       | <sup>4</sup> GKGGKGLGKGGAKR <sup>17</sup>                                                              |
|                       | <b>Unmodified</b>           |                               |                               |                                                                |                                                                                                        |
|                       | K31                         | 1325.702                      | 1325.794                      | 1324.746                                                       | <sup>24</sup> DNIQGITKPAIR <sup>35</sup>                                                               |
|                       | K59                         | 1386.837                      | 1386.904                      | 1385.84                                                        | <sup>56</sup> GVLKVFLNVIR <sup>67</sup>                                                                |
| K79, K91              | 1594.861                    | 1594.962                      | 1594.8912                     | <sup>79</sup> KTVTAMDVVYALKR <sup>92</sup>                     |                                                                                                        |
| <b>Not Determined</b> |                             |                               |                               |                                                                |                                                                                                        |
| K20                   | ND                          | ND                            | 808.5                         | <sup>18</sup> HRKVLR <sup>23</sup>                             |                                                                                                        |

Identification of H3 and H4 confirmed by database search (Mascot ion score (identity threshold) 154(48) and 104 (48), respectively).
